# Supplementary material
Source: PubMed Central journal article supplement (PMC7172628)
Supplement: mmc1.pdf [file mmc1.pdf]

**Table S1. ISG Microarray Data Sets and Inclusion Criteria for Screening, Related to Figures 1A and 1B**

| <b>Supplementary table 1: ISG microarray data sets and inclusion criteria for screening</b> |               |                                                       |                |                                               |
|---------------------------------------------------------------------------------------------|---------------|-------------------------------------------------------|----------------|-----------------------------------------------|
| <b>Reference</b>                                                                            | <b>IFN</b>    | <b>Tissue / cell type</b>                             | <b>Time pt</b> | <b>Inclusion criteria (FC – fold change)*</b> |
| Bartee et al., <i>JVirol.</i> 2009 83(2):498-511                                            | IFN- $\beta$  | primary human fibroblasts                             | 24h            | 2.4-fold                                      |
| Kane et al., <i>Nature</i> 2013 502(7472):563-566                                           | IFN- $\alpha$ | differentiated and undifferentiated THP-1, K562, U937 | 24h            | 2.4-fold                                      |

\*a total of 401 genes were compiled, from which 14 were added to the existing library

Ten publications with microarray data sets from various IFN-treated cell types or tissues were analyzed previously analyzed and 387 ISGs included in the original library (Schoggins et al., 2011). Data from two additional publications was analyzed for this study, and 14 ISGs added. Inclusion criteria: 1) only type I IFN-treated cells or tissues were included (type II IFN excluded), 2) only data from 24h time point were included, 3) only genes with fold changes greater than 2.4 were included (last column).

**Table S2. Spread Scores for ISGs from the Two HTM Screens, Related to Figure 1B**

|                                    | ratio 24/8hpi |             |
|------------------------------------|---------------|-------------|
| ISG name                           | screen #1     | screen #2   |
| MAP3K14                            | 2.22          | 1.86        |
| <b>mean <math>\alpha</math>-HA</b> | <b>2.55</b>   | <b>3.19</b> |
| <i>ELF1</i>                        | 4.64          | 4.16        |
| <i>IFIH1</i>                       | 3.66          | 6.82        |
| <i>IFITM3</i>                      | 9.78          | 1.01        |
| <i>PMM2</i>                        | 9.09          | 5.03        |
| <i>DDX58</i>                       | 5.78          | 11.89       |
| <i>MX1</i>                         | 14.16         | 3.84        |
| <i>FAM46C</i>                      | 17.77         | 0.79        |
| <i>TBX3</i>                        | 15.78         | 3.88        |
| <i>IRF2</i>                        | 14.91         | 5.98        |
| <i>SCO2</i>                        | 18.38         | 4.05        |
| <i>BST2</i>                        | 15.49         | 8.36        |
| <i>SERPINE1</i>                    | 7.63          | 16.56       |
| <i>HERC6</i>                       | 22.75         | 1.53        |
| <i>IRF7</i>                        | 17.71         | 7.03        |
| <i>MOV10</i>                       | 20.82         | 3.99        |
| <i>CCL5</i>                        | 12.01         | 13.19       |
| <i>UPP2</i>                        | 20.30         | 4.92        |
| <i>B2M</i>                         | 19.36         | 6.79        |
| <i>MARCK</i>                       | 26.32         | 0.57        |
| <i>CRY1</i>                        | 17.21         | 9.94        |
| <i>LAMP3</i>                       | 22.57         | 4.77        |
| <i>IL28RA</i>                      | 10.86         | 17.68       |
| <i>RIPK2</i>                       | 21.95         | 6.89        |
| <i>MT1L</i>                        | 19.09         | 10.06       |
| <i>XAF1</i>                        | 18.11         | 11.30       |
| <i>MAFF</i>                        | 17.43         | 12.38       |
| <i>CD274</i>                       | 22.59         | 7.35        |
| <i>TAP2</i>                        | 29.49         | 0.89        |
| <i>IFITM2</i>                      | 20.10         | 10.65       |
| <i>TNFRSF10A</i>                   | 23.36         | 7.49        |
| <i>SAT1</i>                        | 28.94         | 1.95        |
| <i>IRF1</i>                        | 25.26         | 6.03        |
| <i>SLC25A28</i>                    | 17.75         | 13.57       |
| <i>IFI44</i>                       | 30.37         | 1.18        |
| <i>TRIM34</i>                      | 29.65         | 2.01        |
| <i>NPAS2</i>                       | 25.77         | 5.91        |

| <i>GBP5</i>     | 27.96         | 3.87      |
|-----------------|---------------|-----------|
|                 | ratio 24/8hpi |           |
| ISG name        | screen #1     | screen #2 |
| <i>TNFSF10</i>  | 16.27         | 15.80     |
| <i>GPX2</i>     | 23.75         | 8.36      |
| <i>THBD</i>     | 23.64         | 8.65      |
| <i>EIF3EIP</i>  | 13.32         | 19.39     |
| <i>MX2</i>      | 24.86         | 8.16      |
| <i>CSDA</i>     | 25.04         | 8.03      |
| <i>IRF9</i>     | 22.72         | 10.44     |
| <i>SLC15A3</i>  | 25.26         | 8.91      |
| <i>PTMA</i>     | 30.60         | 4.00      |
| <i>KIAA0040</i> | 25.51         | 9.14      |
| <i>ARHGEF3</i>  | 28.94         | 5.88      |
| <i>MYD88</i>    | 20.29         | 15.00     |
| <i>C2orf31</i>  | 20.15         | 15.19     |
| <i>XRN</i>      | 13.68         | 22.14     |
| <i>CCL2</i>     | 28.27         | 7.55      |
| <i>CTCFL</i>    | 25.14         | 11.07     |
| <i>IFI35</i>    | 22.01         | 14.31     |
| <i>FLJ23556</i> | 10.90         | 25.61     |
| <i>DUSP5</i>    | 25.22         | 11.45     |
| <i>ENPP1</i>    | 19.98         | 16.95     |
| <i>HERC5</i>    | 27.03         | 9.90      |
| <i>LMO2</i>     | 26.98         | 10.22     |
| <i>RBCK1</i>    | 29.94         | 7.33      |
| <i>CCL4</i>     | 26.44         | 10.86     |
| <i>SP110</i>    | 17.89         | 19.51     |
| <i>TRIM56</i>   | 36.36         | 1.12      |
| <i>HLA-C</i>    | 25.87         | 11.82     |
| <i>TDRD7</i>    | 28.47         | 9.40      |
| <i>MAFF</i>     | 19.55         | 18.39     |
| <i>LGALS9</i>   | 27.30         | 10.83     |
| <i>LAP3</i>     | 31.96         | 6.58      |
| <i>THOC4</i>    | 21.66         | 17.06     |
| <i>TRIM21</i>   | 19.87         | 18.93     |
| <i>PFKFB3</i>   | 32.12         | 6.78      |
| <i>GMPR</i>     | 36.49         | 2.49      |
| <i>CX3CL1</i>   | 21.13         | 18.07     |
| <i>FER1L3</i>   | 28.65         | 11.03     |

|                 |                      |                  |
|-----------------|----------------------|------------------|
| <i>DEFB1</i>    | 31.27                | 8.66             |
| <i>SAMD4A</i>   | 29.57                | 10.38            |
|                 | <b>ratio 24/8hpi</b> |                  |
| <b>ISG name</b> | <b>screen #1</b>     | <b>screen #2</b> |
| <i>CXCL11</i>   | 32.36                | 7.73             |
| <i>ADM</i>      | 31.84                | 8.55             |
| <i>SPTLC2</i>   | 33.42                | 7.06             |
| <i>FLT1</i>     | 38.31                | 2.20             |
| <i>ULK4</i>     | 24.26                | 16.52            |
| <i>ABLIM3</i>   | 23.18                | 17.87            |
| <i>LGMN</i>     | 28.76                | 12.42            |
| <i>HES4</i>     | 34.45                | 6.95             |
| <i>GBP4</i>     | 34.99                | 6.47             |
| <i>RNF19B</i>   | 19.59                | 22.05            |
| <i>IFIT5</i>    | 32.99                | 9.29             |
| <i>FNDC4</i>    | 23.24                | 19.09            |
| <i>CRP</i>      | 27.07                | 15.44            |
| <i>ZNF313</i>   | 22.61                | 19.93            |
| <i>MT1M</i>     | 22.83                | 19.99            |
| <i>SMAD3</i>    | 34.84                | 8.01             |
| <i>PRAME</i>    | 31.63                | 11.32            |
| <i>AHNAK2</i>   | 33.87                | 9.08             |
| <i>LEPR</i>     | 35.19                | 7.83             |
| <i>MT1H</i>     | 35.77                | 7.26             |
| <i>NCOA3</i>    | 41.10                | 2.05             |
| <i>C9orf19</i>  | 25.27                | 18.00            |
| <i>ABCA9</i>    | 42.75                | 0.52             |
| <i>MTHFD2L</i>  | 21.69                | 21.73            |
| <i>RBM25</i>    | 31.77                | 11.70            |
| <i>SIRPA</i>    | 33.83                | 9.67             |
| <i>HSH2D</i>    | 31.27                | 12.56            |
| <i>APOL1</i>    | 30.96                | 12.88            |
| <i>NCF1</i>     | 22.84                | 21.07            |
| <i>LGALS3</i>   | 23.82                | 20.20            |
| <i>RIPK2</i>    | 28.85                | 15.47            |
| <i>CFB</i>      | 37.94                | 6.80             |
| <i>ERLIN1</i>   | 31.25                | 13.77            |
| <i>CCL19</i>    | 20.88                | 24.18            |
| <i>TNK2</i>     | 20.21                | 24.92            |
| <i>BCL3</i>     | 19.70                | 25.49            |
| <i>MT1G</i>     | 24.62                | 20.74            |
| <i>PXK</i>      | 35.29                | 10.14            |
| <i>ABTB2</i>    | 30.18                | 15.34            |

|                 |                      |                  |
|-----------------|----------------------|------------------|
| <i>ODC1</i>     | 32.59                | 13.01            |
|                 | <b>ratio 24/8hpi</b> |                  |
| <b>ISG name</b> | <b>screen #1</b>     | <b>screen #2</b> |
| <i>MAP3K5</i>   | 29.81                | 16.02            |
| <i>STAP1</i>    | 24.38                | 21.47            |
| <i>EHD4</i>     | 24.13                | 21.82            |
| <i>CXCL10</i>   | 37.61                | 8.39             |
| <i>SP100</i>    | 29.57                | 16.50            |
| <i>TLR7</i>     | 31.43                | 14.86            |
| <i>TRIM5</i>    | 28.20                | 18.17            |
| <i>ISG20</i>    | 34.25                | 12.15            |
| <i>GK</i>       | 35.36                | 11.19            |
| <i>ARG2</i>     | 31.34                | 15.33            |
| <i>PFKFB3</i>   | 30.22                | 16.47            |
| <i>CCDC75</i>   | 38.60                | 8.20             |
| <i>CREB3L3</i>  | 28.12                | 18.77            |
| <i>WHDC1</i>    | 22.67                | 24.31            |
| <i>SECTM1</i>   | 33.97                | 13.14            |
| <i>IFI16</i>    | 41.14                | 5.96             |
| <i>C6orf150</i> | 28.28                | 18.86            |
| <i>CMAH</i>     | 28.00                | 19.17            |
| <i>PLSCR1</i>   | 35.24                | 12.14            |
| <i>MASTL</i>    | 27.82                | 19.75            |
| <i>C4orf32</i>  | 30.51                | 17.11            |
| <i>SOCS2</i>    | 31.97                | 15.72            |
| <i>SAA1</i>     | 19.36                | 28.35            |
| <i>RBM43</i>    | 36.09                | 11.65            |
| <i>ANKFY1</i>   | 22.27                | 25.66            |
| <i>MCOLN</i>    | 31.54                | 16.48            |
| <i>HPSE</i>     | 38.80                | 9.53             |
| <i>AQP9</i>     | 29.25                | 19.08            |
| <i>SLC16A1</i>  | 38.37                | 10.02            |
| <i>FLJ11286</i> | 44.92                | 3.60             |
| <i>USP18</i>    | 34.76                | 13.85            |
| <i>FAM134B</i>  | 37.30                | 11.39            |
| <i>ATF3</i>     | 23.77                | 25.22            |
| <i>ZNF385B</i>  | 40.24                | 9.27             |
| <i>MCL1</i>     | 30.37                | 19.22            |
| <i>BCL2L14</i>  | 25.72                | 23.90            |
| <i>CLEC4D</i>   | 41.31                | 8.52             |
| <i>SLC25A30</i> | 43.26                | 6.77             |
| <i>PPM1K</i>    | 34.31                | 15.99            |
| <i>MICB</i>     | 26.92                | 23.53            |

| ISG name        | ratio 24/8hpi        |           |
|-----------------|----------------------|-----------|
|                 | screen #1            | screen #2 |
| <i>NRN1</i>     | 40.84                | 9.62      |
| <i>BLZF1</i>    | 22.59                | 27.89     |
| <i>DDX60</i>    | 22.03                | 28.51     |
| <i>HCP5</i>     | 41.14                | 9.42      |
| <i>HESX1</i>    | 27.64                | 23.09     |
| <i>BIRC3</i>    | 35.09                | 15.80     |
| <i>PARP12</i>   | 15.53                | 35.41     |
| <i>CCL8</i>     | 27.61                | 23.49     |
| <i>NOS2A</i>    | 49.38                | 1.91      |
| <i>FBXO6</i>    | 35.45                | 15.94     |
| <i>CD74</i>     | 30.53                | 21.07     |
| <i>SERPINB9</i> | 28.57                | 23.08     |
| <i>NDC80</i>    | 43.30                | 8.38      |
| <i>RSAD2</i>    | 42.83                | 9.32      |
| <i>AGPAT9</i>   | 31.60                | 20.57     |
| <i>ZNF295</i>   | 44.14                | 8.08      |
| <i>STAT3</i>    | 29.90                | 22.51     |
| <i>TRIM25</i>   | 35.02                | 17.52     |
| <i>ARNTL</i>    | 48.50                | 4.15      |
| <i>GZMB</i>     | 32.29                | 20.38     |
| <i>N4BP1</i>    | 42.18                | 10.60     |
| <i>OGFR</i>     | 38.24                | 14.89     |
| <i>C9orf91</i>  | 18.63                | 34.95     |
| <i>LAMP3</i>    | 44.51                | 9.23      |
| <i>GCH1</i>     | 44.54                | 9.35      |
| <i>STAT1</i>    | 40.49                | 13.53     |
| <i>CES1</i>     | 44.17                | 9.97      |
| <i>RASSF4</i>   | 38.25                | 15.95     |
| <i>CDKN1A</i>   | 48.19                | 6.32      |
| <i>S100A8</i>   | 40.85                | 13.74     |
| <i>EPSTI1</i>   | 35.18                | 19.46     |
| <i>PCTK2</i>    | 24.94                | 30.04     |
| <i>CD80</i>     | 33.33                | 21.84     |
| <i>PI4K2B</i>   | 19.94                | 35.34     |
| <i>P2RY6</i>    | 51.19                | 4.13      |
| <i>DDIT4</i>    | 39.07                | 16.36     |
| <i>IL15RA</i>   | 41.07                | 14.36     |
| <i>RAB27A</i>   | 36.74                | 18.91     |
| <i>CD163</i>    | 51.86                | 3.80      |
| <i>TRAFD1</i>   | 28.10                | 27.66     |
|                 | <b>ratio 24/8hpi</b> |           |

| ISG name         | screen #1            | screen #2 |
|------------------|----------------------|-----------|
| <i>FUT4</i>      | 37.49                | 18.41     |
| <i>EIF2AK2</i>   | 29.71                | 26.73     |
| <i>GJA4</i>      | 39.98                | 16.58     |
| <i>TAGAP</i>     | 21.92                | 34.79     |
| <i>CHMP5</i>     | 37.41                | 19.32     |
| <i>JUNB</i>      | 29.68                | 27.09     |
| <i>PSMB9</i>     | 34.14                | 22.78     |
| <i>PIM3</i>      | 48.82                | 8.19      |
| <i>FAM70A</i>    | 47.61                | 9.46      |
| <i>LOC400759</i> | 33.39                | 23.75     |
| <i>DTX3L</i>     | 28.96                | 28.21     |
| <i>FKBP5</i>     | 44.14                | 13.13     |
| <i>PABPC4</i>    | 39.52                | 18.14     |
| <i>PBEF1</i>     | 42.31                | 15.41     |
| <i>LY6E</i>      | 52.52                | 5.37      |
| <i>VAMP5</i>     | 33.99                | 24.14     |
| <i>TGFB1</i>     | 26.19                | 32.01     |
| <i>MS4A4A</i>    | 47.19                | 11.08     |
| <i>GBP2</i>      | 44.75                | 13.55     |
| <i>CPT1A</i>     | 29.59                | 28.90     |
| <i>CD9</i>       | 38.93                | 19.57     |
| <i>RGL-1</i>     | 35.29                | 23.22     |
| <i>SCARB2</i>    | 46.53                | 12.30     |
| <i>PDGFRL</i>    | 27.44                | 31.50     |
| <i>UBE2L6</i>    | 42.75                | 16.28     |
| <i>OPTN</i>      | 26.76                | 32.38     |
| <i>EPAS1</i>     | 20.72                | 38.53     |
| <i>APOL2</i>     | 36.77                | 22.48     |
| <i>PADI2</i>     | 29.48                | 30.02     |
| <i>AKT3</i>      | 26.80                | 32.81     |
| <i>ZC3HAV1</i>   | 42.29                | 17.41     |
| <i>LRG1</i>      | 29.87                | 29.93     |
| <i>PCTK3</i>     | 43.73                | 16.08     |
| <i>NAPA</i>      | 46.58                | 13.38     |
| <i>ANGPTL1</i>   | 36.58                | 23.55     |
| <i>LIPA</i>      | 48.77                | 11.58     |
| <i>CASP7</i>     | 32.70                | 27.74     |
| <i>DHX58</i>     | 19.37                | 41.21     |
| <i>STARD5</i>    | 37.38                | 23.36     |
| <i>MAB21L2</i>   | 33.74                | 27.07     |
|                  | <b>ratio 24/8hpi</b> |           |
| ISG name         | screen #1            | screen #2 |

|                 |                      |                  |
|-----------------|----------------------|------------------|
| <i>BATF2</i>    | 35.04                | 25.91            |
| <i>SSBP3</i>    | 41.47                | 19.65            |
| <i>TMEM51</i>   | 31.30                | 29.85            |
| <i>TRIM38</i>   | 44.64                | 16.70            |
| <i>DNAPTP6</i>  | 39.19                | 22.18            |
| <i>APOL6</i>    | 31.98                | 29.50            |
| <i>ADAMDEC1</i> | 42.80                | 18.73            |
| <i>GEM</i>      | 49.29                | 12.41            |
| <i>IFIT3</i>    | 41.11                | 20.64            |
| <i>TNFAIP3</i>  | 26.10                | 35.74            |
| <i>DCP1A</i>    | 42.81                | 19.08            |
| <i>SAMHD1</i>   | 40.89                | 21.11            |
| <i>IFI44L</i>   | 37.45                | 24.66            |
| <i>CCR1</i>     | 40.27                | 22.12            |
| <i>KIAA1618</i> | 55.28                | 7.35             |
| <i>SOCS1</i>    | 24.36                | 38.60            |
| <i>CD69</i>     | 54.34                | 8.95             |
| <i>CXCL9</i>    | 37.13                | 26.30            |
| <i>SIGLEC1</i>  | 35.71                | 27.76            |
| <i>INDO</i>     | 52.48                | 11.10            |
| <i>ISG15</i>    | 40.00                | 23.80            |
| <i>AIM2</i>     | 32.32                | 31.49            |
| <i>UNC84B</i>   | 27.60                | 36.34            |
| <i>ETV6</i>     | 37.53                | 26.79            |
| <i>OAS3</i>     | 56.73                | 7.70             |
| <i>PSMB8</i>    | 37.27                | 27.24            |
| <i>C5orf27</i>  | 32.34                | 32.31            |
| <i>C22orf28</i> | 43.01                | 21.70            |
| <i>IFI27</i>    | 36.21                | 28.57            |
| <i>NUP50</i>    | 56.80                | 8.26             |
| <i>CNP</i>      | 41.76                | 23.32            |
| <i>FLJ39739</i> | 29.87                | 36.42            |
| <i>HLA-F</i>    | 30.31                | 36.10            |
| <i>TNFAIP6</i>  | 40.06                | 26.46            |
| <i>IL17RB</i>   | 31.17                | 35.56            |
| <i>DYNLT1</i>   | 33.46                | 33.63            |
| <i>HEG1</i>     | 45.24                | 22.04            |
| <i>NOD2</i>     | 41.82                | 25.74            |
| <i>FAM125B</i>  | 30.10                | 37.48            |
| <i>PDK1</i>     | 32.09                | 35.50            |
|                 | <b>ratio 24/8hpi</b> |                  |
| <b>ISG name</b> | <b>screen #1</b>     | <b>screen #2</b> |
| <i>TCF7L2</i>   | 44.41                | 23.18            |

|                 |                      |                  |
|-----------------|----------------------|------------------|
| <i>HK2</i>      | 63.56                | 4.38             |
| <i>RARRES3</i>  | 46.52                | 21.44            |
| <i>NT5C3</i>    | 38.90                | 29.09            |
| <i>UNC93B1</i>  | 35.45                | 32.57            |
| <i>PNRC1</i>    | 40.74                | 27.46            |
| <i>PUS1</i>     | 27.40                | 40.86            |
| <i>TIMP1</i>    | 28.47                | 39.83            |
| <i>IL1R</i>     | 40.31                | 28.05            |
| <i>LINCR</i>    | 36.64                | 32.52            |
| <i>SQLE</i>     | 31.41                | 38.46            |
| <i>RASGEF1B</i> | 33.02                | 37.10            |
| <i>IFNGR1</i>   | 54.81                | 15.38            |
| <i>VEGFC</i>    | 26.99                | 43.35            |
| <i>GAK</i>      | 35.35                | 35.11            |
| <i>DDX60</i>    | 30.54                | 40.24            |
| <i>MAFF</i>     | 34.13                | 37.08            |
| <i>IFI30</i>    | 33.47                | 37.90            |
| <i>ARHGAP17</i> | 66.68                | 4.75             |
| <i>HLA-G</i>    | 21.49                | 50.09            |
| <i>TLR3</i>     | 32.41                | 39.50            |
| <i>EXT1</i>     | 33.18                | 38.75            |
| <i>PHF15</i>    | 52.77                | 19.18            |
| <i>BTN3A3</i>   | 43.96                | 28.12            |
| <i>GALNT2</i>   | 51.78                | 20.77            |
| <i>FCGR1A</i>   | 23.06                | 49.48            |
| <i>IL15</i>     | 52.56                | 20.08            |
| <i>FNDC3B</i>   | 63.96                | 8.73             |
| <i>CLEC4A</i>   | 32.01                | 40.71            |
| <i>TMEM49</i>   | 52.72                | 20.42            |
| <i>MT1F</i>     | 58.32                | 15.37            |
| <i>CLEC2B</i>   | 52.24                | 21.45            |
| <i>SLFN5</i>    | 66.27                | 8.14             |
| <i>NFIL3</i>    | 51.46                | 23.21            |
| <i>CEACAM1</i>  | 66.56                | 8.13             |
| <i>CCDC92</i>   | 28.34                | 46.60            |
| <i>CCNA1</i>    | 42.97                | 31.97            |
| <i>GBP3</i>     | 42.16                | 32.97            |
| <i>IL6ST</i>    | 53.06                | 22.74            |
| <i>ATP10D</i>   | 52.92                | 25.22            |
|                 | <b>ratio 24/8hpi</b> |                  |
| <b>ISG name</b> | <b>screen #1</b>     | <b>screen #2</b> |
| <i>ADFP</i>     | 55.87                | 22.29            |
| <i>GLRX</i>     | 59.48                | 18.77            |

|                   |                      |                  |
|-------------------|----------------------|------------------|
| <i>OASL</i>       | 70.69                | 8.75             |
| <i>GTPBP2</i>     | 26.87                | 53.09            |
| <i>IRF2</i>       | 33.90                | 46.57            |
| <i>RGS1</i>       | 32.38                | 48.54            |
| <i>STAT2</i>      | 29.52                | 51.41            |
| <i>CYP1B1</i>     | 44.55                | 37.94            |
| <i>DDX3X</i>      | 77.11                | 5.51             |
| <i>C10orf10</i>   | 35.04                | 47.71            |
| <i>HSPA6</i>      | 67.87                | 15.29            |
| <i>PNPT1</i>      | 36.24                | 47.56            |
| <i>RNF24</i>      | 50.77                | 33.72            |
| <i>OAS1</i>       | 79.82                | 5.46             |
| <i>RPL22</i>      | 60.99                | 24.75            |
| <i>SLC1A1</i>     | 55.71                | 30.32            |
| <i>AXUD1</i>      | 39.72                | 46.58            |
| <i>CCDC109B</i>   | 35.29                | 51.15            |
| <i>NMI</i>        | 62.52                | 23.98            |
| <i>C15orf48</i>   | 54.76                | 31.90            |
| <i>PPM1K</i>      | 71.34                | 15.63            |
| <i>ETV7</i>       | 31.06                | 56.33            |
| <i>PML</i>        | 50.04                | 38.16            |
| <i>CD38</i>       | 28.32                | 60.14            |
| <i>ADAR</i>       | 53.20                | 35.41            |
| <i>TREX1</i>      | 26.55                | 62.58            |
| <i>IGFBP2</i>     | 34.22                | 55.74            |
| <i>G6PC</i>       | 34.86                | 55.12            |
| <i>ZBP1</i>       | 62.50                | 27.65            |
| <i>ALDH1A1</i>    | 73.55                | 17.03            |
| <i>UBA7</i>       | 67.73                | 23.63            |
| <i>SPSB1</i>      | 50.71                | 40.74            |
| <i>GBP1</i>       | 58.13                | 34.01            |
| <i>PARP10</i>     | 34.92                | 57.88            |
| <b>mean empty</b> | <b>46.52</b>         | <b>56.85</b>     |
| <i>GCA</i>        | 49.52                | 44.70            |
| <i>IMPA2</i>      | 57.93                | 37.69            |
|                   | <b>ratio 24/8hpi</b> |                  |
| <b>ISG name</b>   | <b>screen #1</b>     | <b>screen #2</b> |

|                 |        |        |
|-----------------|--------|--------|
| <i>PMAIP1</i>   | 42.41  | 53.77  |
| <i>SNN</i>      | 30.60  | 66.84  |
| <i>IFITM1</i>   | 71.58  | 27.40  |
| <i>C4orf33</i>  | 33.39  | 66.87  |
| <i>OAS2</i>     | 65.89  | 34.48  |
| <i>IFI6</i>     | 96.65  | 4.51   |
| <i>B4GALT5</i>  | 47.20  | 56.48  |
| <i>CASP1</i>    | 76.36  | 27.45  |
| <i>IFIT1</i>    | 84.54  | 20.13  |
| <i>WARS</i>     | 52.58  | 52.98  |
| <i>MAX</i>      | 36.84  | 68.92  |
| <i>FFAR2</i>    | 100.75 | 5.64   |
| <i>RNASE4</i>   | 97.65  | 8.78   |
| <i>SERPING1</i> | 45.79  | 63.09  |
| <i>C1S</i>      | 46.27  | 63.20  |
| <i>IL1RN</i>    | 78.21  | 32.68  |
| <i>AMPH</i>     | 47.67  | 63.52  |
| <i>IFIT2</i>    | 73.15  | 38.12  |
| <i>APOL3</i>    | 47.10  | 65.07  |
| <i>BUB1</i>     | 106.51 | 5.71   |
| <i>HLA-E</i>    | 95.45  | 18.85  |
| <i>KIAA0082</i> | 63.09  | 52.34  |
| <i>APOBEC3A</i> | 106.66 | 10.33  |
| <i>CEBPD</i>    | 50.78  | 66.56  |
| <i>BLVRA</i>    | 61.07  | 59.23  |
| <i>ANKRD22</i>  | 81.24  | 42.84  |
| <i>TFEC</i>     | 43.74  | 86.88  |
| <i>PRKD2</i>    | 114.63 | 16.03  |
| <i>KIAA0082</i> | 97.63  | 39.68  |
| <i>COMMD3</i>   | 61.67  | 117.87 |
| <i>TAP1</i>     | 180.46 | 43.24  |
| <i>MSR1</i>     | 179.96 | 50.40  |
| <i>TNFSF13B</i> | 222.42 | 36.49  |
| <i>MAFB</i>     | 210.34 | 48.85  |
| <i>TXNIP</i>    | 307.64 | 38.41  |
| <i>CCND3</i>    | 415.84 | 35.37  |

**Table S3. Primer Sequences, Related to Figures 2A, 3E–3G, 4B–4E, 5B, 5J, S2A–S2D, S3D, S3E, S5D, and S5E**

| <b>Experiment</b>    | <b>Specificity</b>             |                          | <b>Sequence 5'-3'</b>              |
|----------------------|--------------------------------|--------------------------|------------------------------------|
| SYBR green assay     | human SERPINE1                 | fwd                      | GGACTTTTCAGAGGTGGAGAGAGC           |
|                      |                                | rev                      | TGATTTGTGGAAGAGGCGGC               |
|                      | human TGF- $\beta$             | fwd                      | CCCAGCATCTGCAAAGCTC                |
|                      |                                | rev                      | GTCAATGTACAGCTGCCGCA               |
|                      | human BST2                     | fwd                      | ATGGAAGACGGGGATAAGCG               |
|                      |                                | rev                      | ATGGGTGACATTGCGACACTCC             |
|                      | human ISG15                    | fwd                      | GGCTGGGAGCTGACGGTGAAG              |
|                      |                                | rev                      | GCTCCGCCCGCCAGGCTCTGT              |
|                      | human IFITM3                   | fwd                      | TGTCGTCTGGTCCCTGTTCAAC             |
|                      |                                | rev                      | ACCTTCACGGAGTAGGCGAATG             |
|                      | human RPS11                    | fwd                      | GCCGAGACTATCTGCACTAC               |
|                      |                                | rev                      | ATGTCCAGCCTCAGAACTTC               |
|                      | murine TGF- $\beta$            | fwd                      | TGCTAATGGTGGACCGCAAC               |
|                      |                                | rev                      | CACTGCTTCCCGAATGTCTGAC             |
|                      | murine RSAD2                   | fwd                      | TCTTGCTATCTCCTGCGACAGC             |
|                      |                                | rev                      | TGAAAGCCACCTTGTAAATCCCTG           |
|                      | murine RPS11                   | fwd                      | AATGCCCTTCACTGGTAACG               |
|                      |                                | rev                      | TTCGGATGTAATGGAGATAGTCCC           |
|                      | murine Serpine1                | fwd                      | CGACAGCCAACAAGAGCCAATC             |
|                      |                                | rev                      | AACCCTTTCCAGAGACCAGAACC            |
|                      | murine IFN- $\beta$            | fwd                      | AAGAGTTACACTGCCTTTGCCATC           |
|                      |                                | rev                      | CACTGTCTGCTGGTGGAGTTCATC           |
|                      | murine TNF- $\alpha$           | fwd                      | GCCCCAGTCTGTATCCTTCTAAC            |
|                      |                                | rev                      | CCCAGCATCTTGTGTTTCTGAGTAG          |
| murine MIP-2         | fwd                            | CCCAGACAGAAGTCATAGCCACTC |                                    |
|                      | rev                            | GGTCAGTTAGCCTTGCCTTTGTTC |                                    |
| murine IL-6          | fwd                            | CTTCCATCCAGTTGCCTTCTTG   |                                    |
|                      | rev                            | TGTTGGGAGTGGTATCCTCTGTG  |                                    |
| Taqman Real-Time PCR | A/WSN/33 HA segment            | fwd                      | GACACAACGGGAAACTATGTAA             |
|                      |                                | rev                      | GCTGGAAGCAGTGAGTC                  |
|                      |                                | probe                    | FAM-TTCCCAATTGTAGTGGGGCTATTCC-BHQ1 |
|                      | A/PuertoRico/8/1934 HA segment | fwd                      | TTTATAGAGGGAGGATGG                 |
|                      |                                | rev                      | GAGTGGATTCTTTGTCTG                 |
|                      |                                | probe                    | FAM-TTCCCAATTGTAGTGGGGCTATTCC-BHQ1 |
|                      | A/X-31 matrix segment          | fwd                      | AAGACCAATCCTGTCACCTCTGA            |
|                      |                                | rev                      | CAAAGCGTCTACGCTGCAGTCC             |
|                      |                                | probe                    | FAM-TTTGTGTTACGCTCACCGT-TAMRA      |

| <b>Method</b> | <b>construct</b> |     | <b>Sequence 5'-3'</b> |
|---------------|------------------|-----|-----------------------|
| TOPO          | PAI-1            | fwd | ATGCAGATGTCTCCAGCC    |

|                           |                               |     |                                             |
|---------------------------|-------------------------------|-----|---------------------------------------------|
| cloning                   | full length                   | rev | TCAGGGTTCCATCACTTGG                         |
| Quikchange<br>mutagenesis | PAI-1<br>T356R<br>(SERPINE1*) | fwd | GAGGTGAACGAGAGTGGCAGGGTGGCCTCCT<br>CATCCACA |
|                           |                               | rev | TGTGGATGAGGAGGCCACCCTGCCACTCTCGT<br>TCACCTC |
